# Supplementary material for: Meiotic Chromosome Pairing Is Promoted by Telomere-Led Chromosome Movements Independent of Bouquet Formation
Source: PLoS Genet. 2012 May 24;8(5):e1002730. doi: 10.1371/journal.pgen.1002730 (PMC3359977; doi:10.1371/journal.pgen.1002730)
Supplement: Table S3 — Strains used in Figure 4. (XLS) [file pgen.1002730.s004.xls]

## Sheet: Figure 4 Strains
	Table S3. Strains used in Figure 4
			wild-type	mps3-dCC	mps3-dAR	ndj1∆
		chromosome 5 CEN	MDY3285XMDY3286	MDY3304XMDY3305	MDY3301XMDY3302	MDY3462XMDY3463
		chromosome 5L MID	MDY3248XMDY3249	MDY3281XMDY3284	MDY3254XMDY3257	MDY3465XMDY3466
		chromosome 5L TEL	MDY3251XMDY3252	MDY3313XMDY3314	MDY3255XMDY3259	MDY3457XMDY3460
		chromosome 7 CEN	MDY2829XMDY2841	MDY2843XMDY3481	MDY2846XMDY3080	MDY2873XMDY2871
		chromosome 7L MID	MDY2256XMDY2196	MDY2583XMDY2586	MDY2533XMDY2532	MDY2254XMDY2198
		chromosome 7L TEL	MDY3471XMDY2935	MDY3477xMDY3479	MDY3431XMDY3453	MDY3473XMDY3467
		chromosome 1 CEN	MDY3265XMDY3266		MDY3275XMDY3276
		chromosome 1L MID	MDY3414XMDY3412		MDY3416XMDY3415
		chromosome 1L TEL	MDY3418XMDY3417		MDY3421XMDY3419
		chromosome 4R TEL	MDY2426XMDY2266	MDY2580XMDY2582	MDY2523XMDY2524	MDY2294XMDY2279
